# Supplementary material for: Enhanced adsorption of aromatic chemicals on boron and nitrogen co-doped single-walled carbon nanotubes
Source: Royal Society of Chemistry journal article supplement (doi:10.1039/c6en00590j), 2017-01-01
Supplement: c6en00590j1.pdf [file c6en00590j1.pdf]

Electronic Supplementary Information (ESI) for *Environmental Science: Nano*

**Enhanced adsorption of aromatic chemicals to boron and nitrogen co-doped single-walled carbon nanotubes**

Lilin Wang,<sup>ab</sup> Dongqiang Zhu,<sup>c</sup> Jingwen Chen,<sup>d</sup> Yongsheng Chen,<sup>e</sup> and Wei Chen<sup>b\*</sup>

<sup>a</sup> Sichuan Key Laboratory of Agricultural Environmental Engineering, College of Environmental Sciences, Sichuan Agricultural University, Chengdu 611130, China

<sup>b</sup> College of Environmental Science and Engineering, Nankai University, Tianjin 300350, China

<sup>c</sup> School of Urban and Environmental Sciences, Peking University, Beijing 100871, China

<sup>d</sup> Key Laboratory of Industrial Ecology and Environmental Engineering (MOE), School of Environmental Science and Technology, Dalian University of Technology, Dalian 116024, China

<sup>e</sup> Key Laboratory of Functional Polymer Materials and Center for Nanoscale Science and Technology, College of Chemistry, Nankai University, Tianjin 300071, China.

Number of pages: 9

Number of tables: 2

Number of figures: 3

***Dubinin–Astakhov (DA) model and multiple linear regression analysis between the characteristic energy of adsorption (E) and solvatochromic parameters of organic compounds***

To further understand the effects of B and N co-doping on the electron donor–acceptor interactions, in particular, how the enhanced surface polarization can affect adsorption energy, the adsorption data were analyzed using the approach developed by Yang et al.<sup>S1, S2</sup> Specifically, multiple linear relationship of the Dubinin–Astakhov (DA) model characteristic energy of adsorption and the solvatochromic parameters of the aromatics (i.e., the hydrogen bonding donor parameter  $\alpha_m$  and the  $\pi$ -electron polarizability parameter  $\pi^*$ ) were obtained, to understand the relative significance of specific/polar interactions of BN-SWCNT, as compared with the undoped SWCNT.

The DA model is expressed as:

$$\log q_e = \log Q^0 - (\varepsilon / E)^b$$

where  $q_e$  (mg/g) is the adsorbed amount of organic compound in equilibrium;  $Q^0$  (mg/g) is the adsorption capacity of organic compound;  $\varepsilon$  (kJ/mol),  $\varepsilon = RT \ln(C_s/C_e)$ , is the effective adsorption potential;  $C_e$  (mg/L) is the equilibrium concentration of organic compound in aqueous phase;  $C_s$  (mg/L) is the water solubility of organic compound;  $R$  ( $8.314 \times 10^{-3}$  kJ/(mol·K)) is the universal gas constant;  $T$  (K) is the absolute temperature;  $E$  (kJ/mol) is the “correlating divisor” of the effective adsorption potential  $\varepsilon$ , and can be understood as the characteristic energy of adsorption; and  $b$  is a fitting parameter. The fitting results were list in **Table S2**.

Multiple linear regressions were conducted by SigmaPlot 10.0 to establish the linear solvation energy relationships (LSERs) combining the DA model fitted adsorption affinity parameter,  $E$ , with the solvatochromic parameters,  $\pi^*$  (the  $\pi$ -

electron polarizability parameter) and  $\alpha_m$  (the hydrogen bonding donor parameter), of the investigated organic compounds for SWCNT and BN-SWCNT, respectively.

Reasonable good linear relationship between  $E$  and the solvatochromic parameters  $\alpha_m$  and  $\pi^*$  of the organic compounds (except 1-naphthylamine) was observed for both SWCNT and BN-SWCNT:

SWCNT:

$$E = 24.93 (\pm 3.25) \times \alpha_m + 9.96 (\pm 3.41) \times \pi^* + 4.91 (\pm 3.35)$$

$$R^2 = 0.968$$

BN-SWCNT:

$$E = 44.20 (\pm 4.46) \times \alpha_m + 16.67 (\pm 4.67) \times \pi^* + 9.80 (\pm 4.59)$$

$$R^2 = 0.978$$

The fitted  $\pi^*$  coefficient for BN-SWCNT (16.67) is significant greater than that for SWCNT (9.96), indicating that doping with B and N can significantly enhance the  $\pi$ - $\pi$  EDA interactions.

**Table S1** Summary of Log  $K_d$  values of the adsorbates on carbon nanotubes and on activated carbons. <sup>a</sup>

|                    | CNT <sup>b</sup> |          | Activated carbons    |                                                                                                 |
|--------------------|------------------|----------|----------------------|-------------------------------------------------------------------------------------------------|
|                    | SWCNT            | BN-SWCNT | Modeled <sup>c</sup> | Experimental                                                                                    |
| benzene            | 3.60             | 4.14     | 4.32                 | 4.46 (2.30E-02) <sup>S4</sup><br>4.13 (7.30E-02) <sup>S5</sup>                                  |
| benzonitrile       | 3.90             | 4.34     | 3.72                 | data not found                                                                                  |
| nitrobenzene       | 4.08             | 4.70     | 4.20                 | 2.78 (8.13E-01) <sup>S6</sup><br>3.95 (2.44E-01) <sup>S7</sup><br>3.81 (2.00E-01) <sup>S8</sup> |
| 1,3-dinitrobenzene | 4.44             | 4.71     | 4.05                 | data not found                                                                                  |
| 2-naphthol         | 4.94             | 5.10     | 5.75                 | 4.99 (1.00E-02) <sup>S9</sup>                                                                   |
| 1-naphthylamine    | 5.43             | 5.40     | 4.33                 | data not found                                                                                  |

<sup>a</sup>  $K_d$  (L/kg) represents solid–water distribution coefficient of an adsorbate. Data in parentheses are the corresponding equilibrium aqueous concentrations ( $C_w$ , mmol/L).

<sup>b</sup> Experimental data of this study (corresponding to a  $C_w$  of 0.01 mmol/L).

<sup>c</sup> Calculated using the linear solvation energy relationships developed by Blum et al.<sup>S3</sup>

**Table S2** Results of DA model fits to adsorption data of six model adsorbates on SWCNT and BN-SWCNT.

| <b>Adsorbate</b>   | <b>CNT</b> | <b><math>Q^0</math> (mg/g)</b> | <b><math>E</math> (kJ/mol)</b> | <b><math>b</math></b> | <b><math>R^2</math></b> |
|--------------------|------------|--------------------------------|--------------------------------|-----------------------|-------------------------|
| benzene            | SWCNT      | 186.2                          | 11.98                          | 1.243                 | 0.984                   |
|                    | BN-SWCNT   | 107.9                          | 22.34                          | 1.771                 | 0.997                   |
| benzonitrile       | SWCNT      | 302.0                          | 12.04                          | 0.992                 | 0.986                   |
|                    | BN-SWCNT   | 152.1                          | 25.21                          | 1.672                 | 0.999                   |
| nitrobenzene       | SWCNT      | 283.8                          | 14.60                          | 1.142                 | 0.994                   |
|                    | BN-SWCNT   | 213.3                          | 27.12                          | 1.060                 | 0.960                   |
| 1,3-dinitrobenzene | SWCNT      | 224.9                          | 18.89                          | 1.458                 | 0.991                   |
|                    | BN-SWCNT   | 305.5                          | 29.59                          | 0.977                 | 0.999                   |
| 2-naphthol         | SWCNT      | 415.0                          | 28.29                          | 1.066                 | 0.996                   |
|                    | BN-SWCNT   | 384.6                          | 50.43                          | 1.057                 | 0.992                   |
| 1-naphthylamine    | SWCNT      | 653.1                          | 64.60                          | 1.119                 | 0.995                   |
|                    | BN-SWCNT   | 781.6                          | 56.66                          | 1.006                 | 0.991                   |

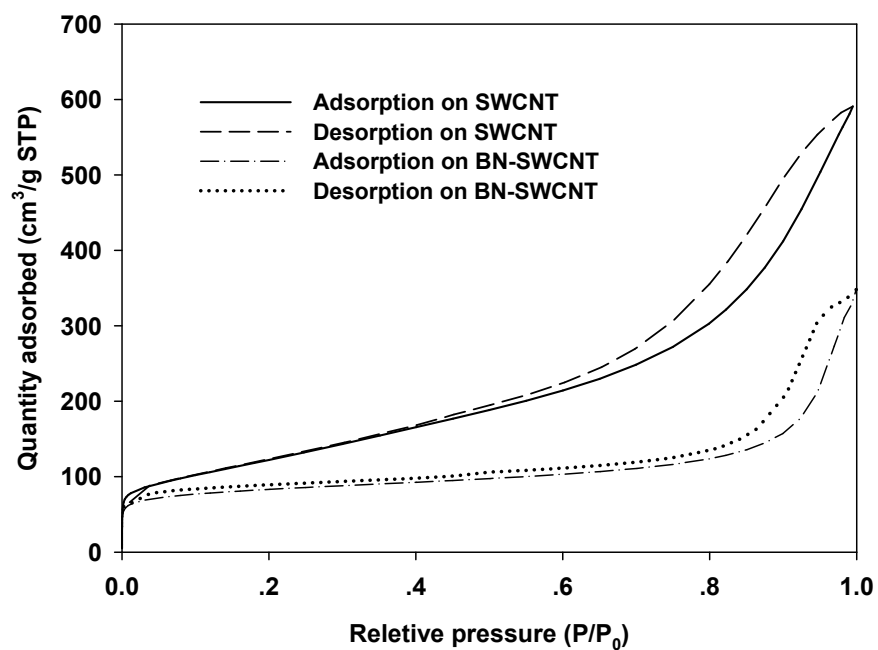

Fig. S1 N<sub>2</sub> adsorption and desorption isotherms to SWCNT and BN-SWCNT.

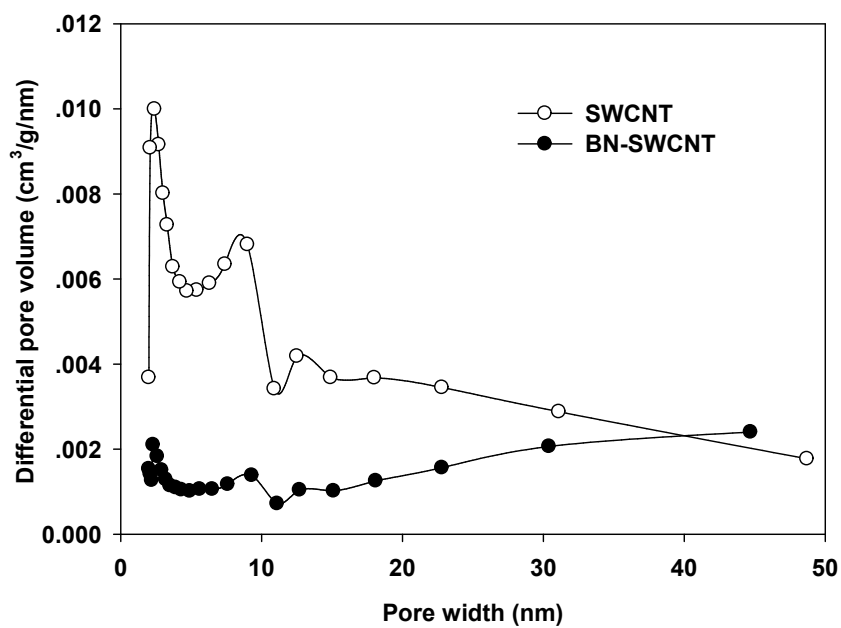

**Fig. S2** Pore size distributions of SWCNT and BN-SWCNT, plotted as differential pore volume versus pore width.

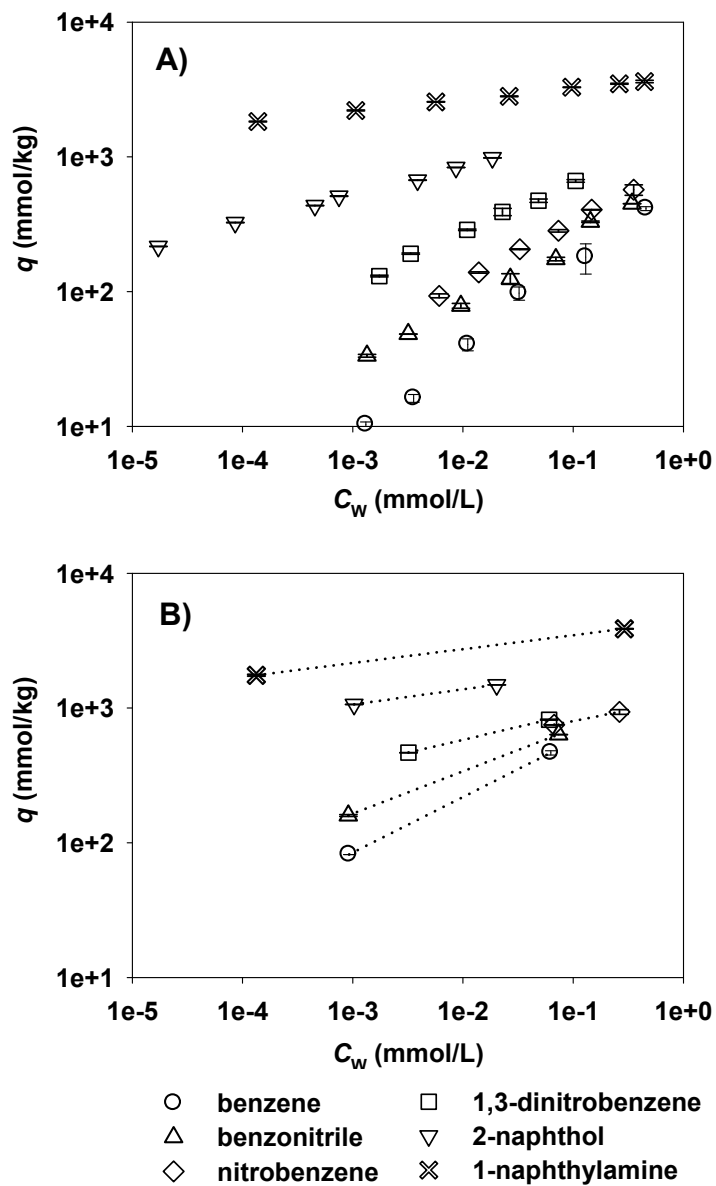

**Fig. S3** Adsorption data of six model aromatics to: A) SWCNT; and B) BN-SWCNT.



## References

- S1. W. Wu, W. Chen, D. Lin and K. Yang, *Environ. Sci. Technol.*, 2012, **46**, 5446-5454.
- S2. K. Yang, W. Wu, Q. Jing and L. Zhu, *Environ. Sci. Technol.*, 2008, **42**, 7931-7936.
- S3. D. J. W. Blum, I. H. Suffet and J. P. Duguet, *Crit. Rev. Env. Sci. Tec.*, 1993, **23**, 121-136.
- S4. I. Pikaar, A. A. Koelmans and P. C. M. van Noort, *Chemosphere*, 2006, **65**, 2343-2351.
- S5. N. Wibowo, L. Setyadi, D. Wibowo, J. Setiawan and S. Ismadji, *J. Hazard. Mater.*, 2007, **146**, 237-242.
- S6. S. Liu and R. Wang, *J. Porous Mat.*, 2010, **18**, 99-106.
- S7. P. Aggarwal, J. C. Kapoor, S. K. Kapoor, A. K. Bhalla and R. C. Bansal, *Indian J. Chem. Techn.*, 1996, **3**, 187-190.
- S8. Y. Kato, M. Machida and H. Tatsumoto, *J. Colloid Interf. Sci.*, 2008, **322**, 394-398.
- S9. S. Nouri, R. M. D. Abad and M. Bahram, *J. Iran. Chem. Soc.*, 2012, **9**, 397-405.
